# Supplementary material for: Metabolic Disturbances Identified in Plasma Samples from ST-Segment Elevation Myocardial Infarction Patients
Source: Hindawi journal article supplement (doi:10.1155/2019/7676189), 2019-07-01
Supplement: f1 [file 7676189.f1.pdf]

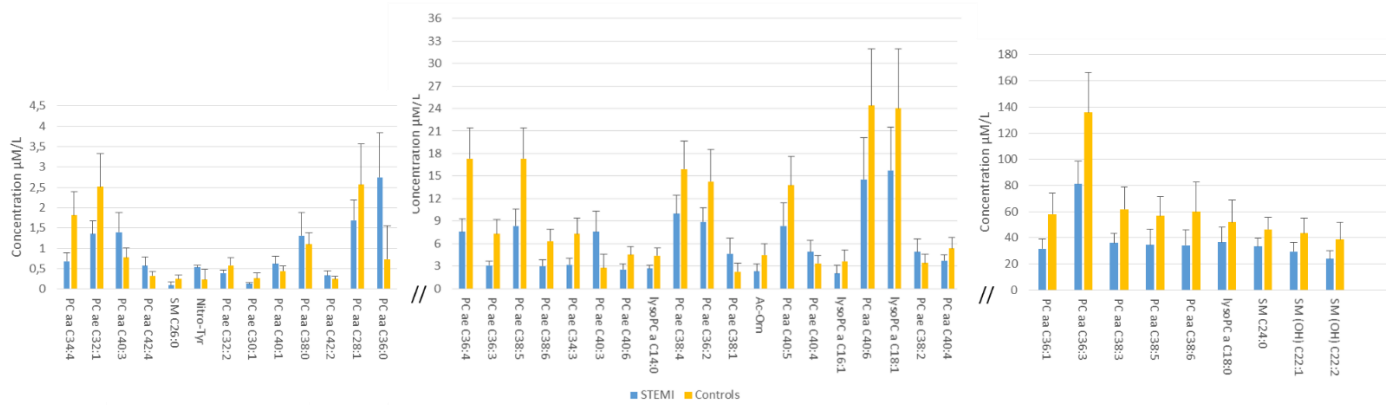

**Figure 1S.** Mean of metabolic concentrations. All presented metabolites have a  $p$ -value  $<0,05$  and VIP scores (variable influence on the projection) greater than 1.
